# Supplementary material for: Highly sensitive strain sensors with ultra-low detection limit based on pre-defined serpentine cracks
Source: Royal Society of Chemistry journal article supplement (doi:10.1039/d4mh01136h), 2024-10-19
Supplement: d4mh01136h1.pdf [file d4mh01136h1.pdf]

### Supporting information

Qingshi Meng<sup>a,#</sup>, Tengfei Chi<sup>a,#</sup>, Shuang Guo<sup>b</sup>, Milad Razbin,<sup>c</sup> Shuying Wu,<sup>c</sup> Shuai He,<sup>d\*</sup>  
Sensen Han<sup>a,\*</sup>, Shuhua Peng<sup>d,\*</sup>

<sup>a</sup> College of Aerospace Engineering, Shenyang Aerospace University, Shenyang 110136, China

<sup>b</sup> Health Service Department, Northern Theatre General Hospital, Shenyang, 110016, China

<sup>c</sup> School of Aerospace, Mechanical and Mechatronic Engineering, The University of Sydney, Sydney, NSW 2006, Australia

<sup>d</sup> School of Mechanical and Manufacturing Engineering, The University of New South Wales, Sydney, NSW 2052, Australia

\*Corresponding Author: Sensen Han, Shuai He, and Shuhua Peng

Email: [sauhansen@163.com](mailto:sauhansen@163.com), [shuai.he@unsw.edu.au](mailto:shuai.he@unsw.edu.au), [shuhua.peng@unsw.edu.au](mailto:shuhua.peng@unsw.edu.au)

#These authors contributed equally to this work.

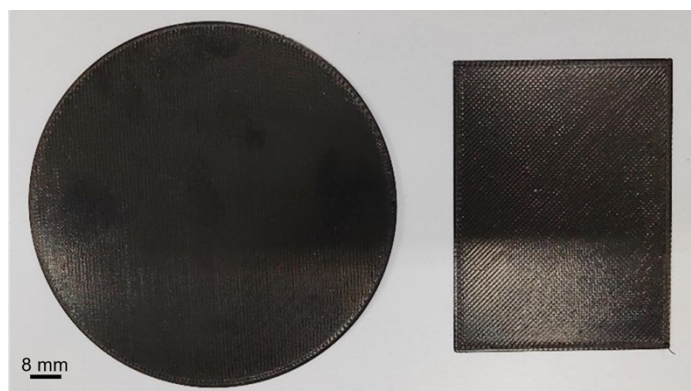

**Figure S1.** Image of 3D printing conductive films with thickness of 0.5 mm before cutting.

(a)

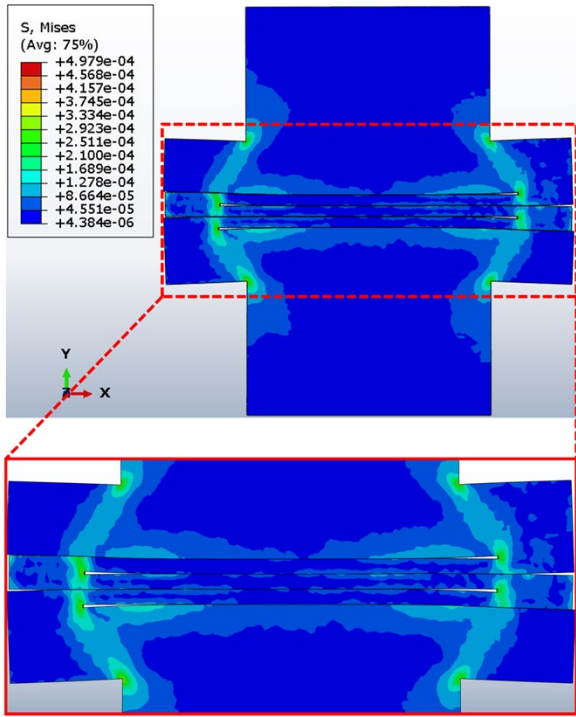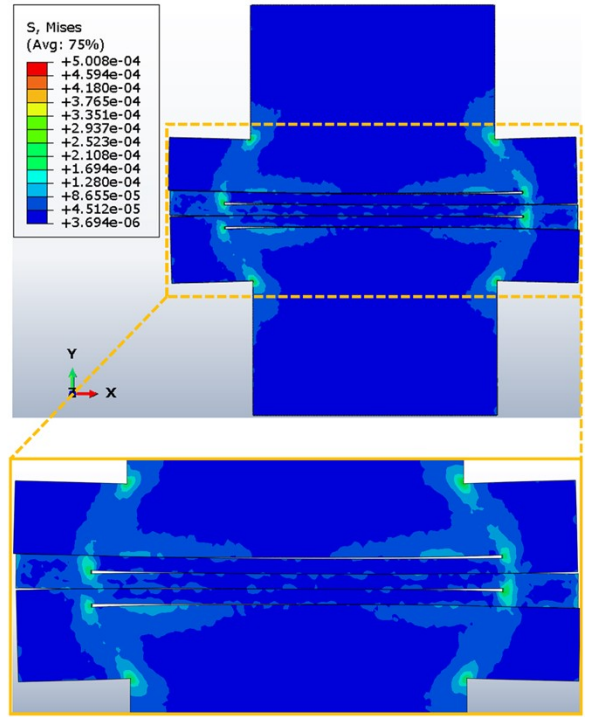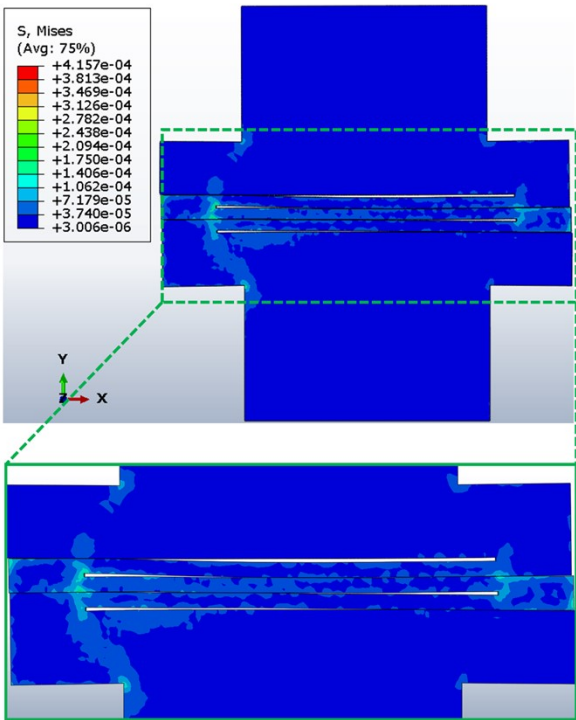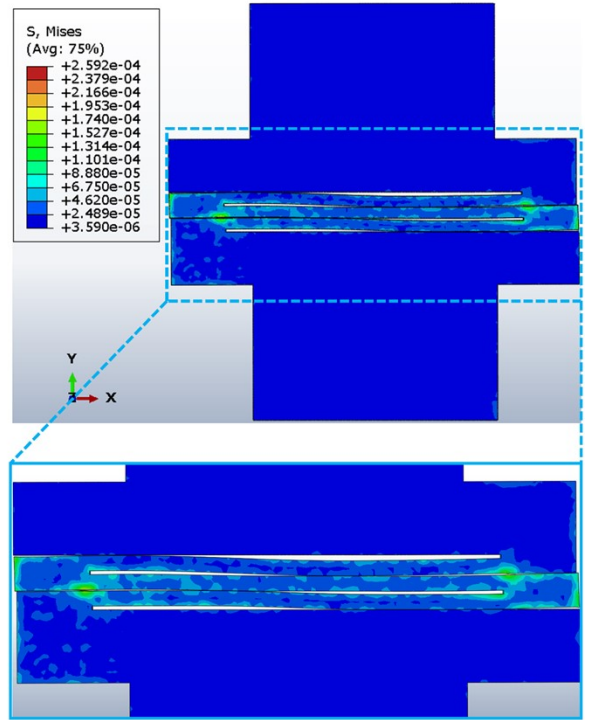

10% strain

15% strain

(b)

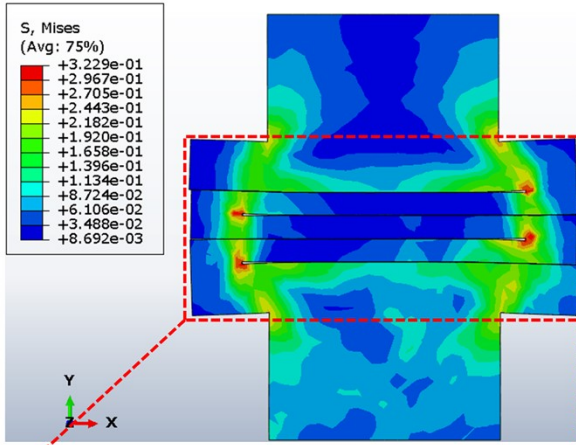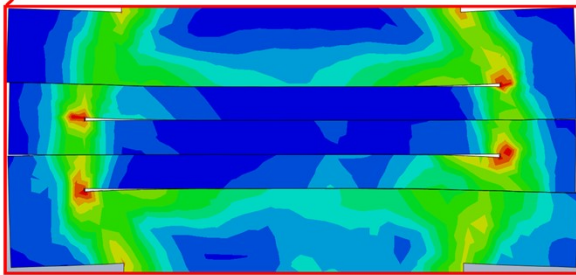

0% strain

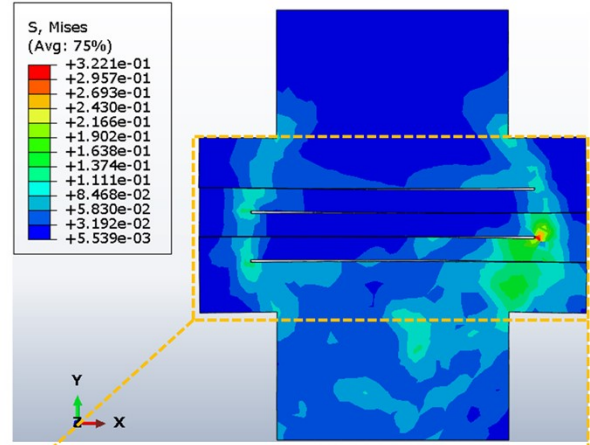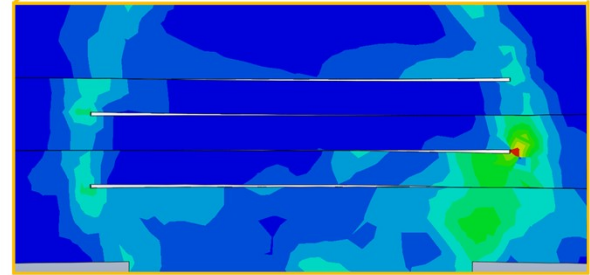

5% strain

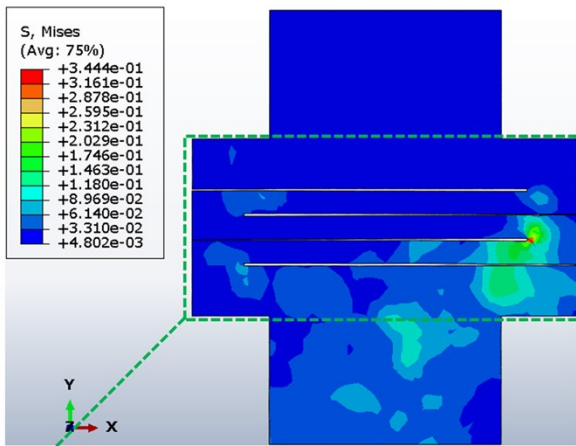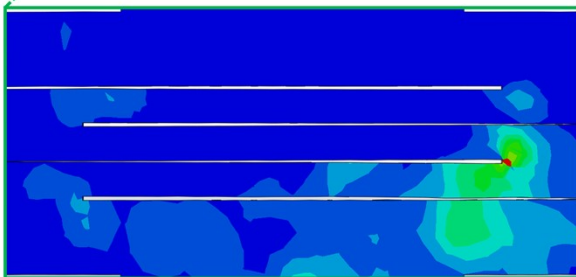

10% strain

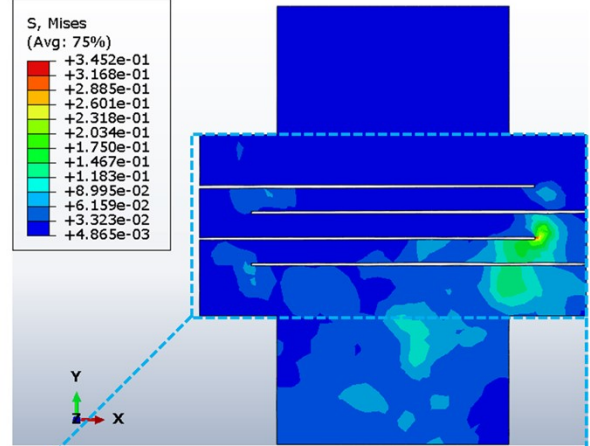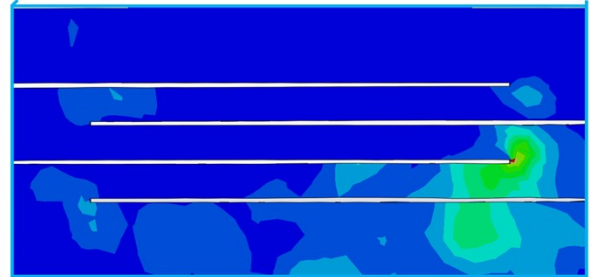

15% strain

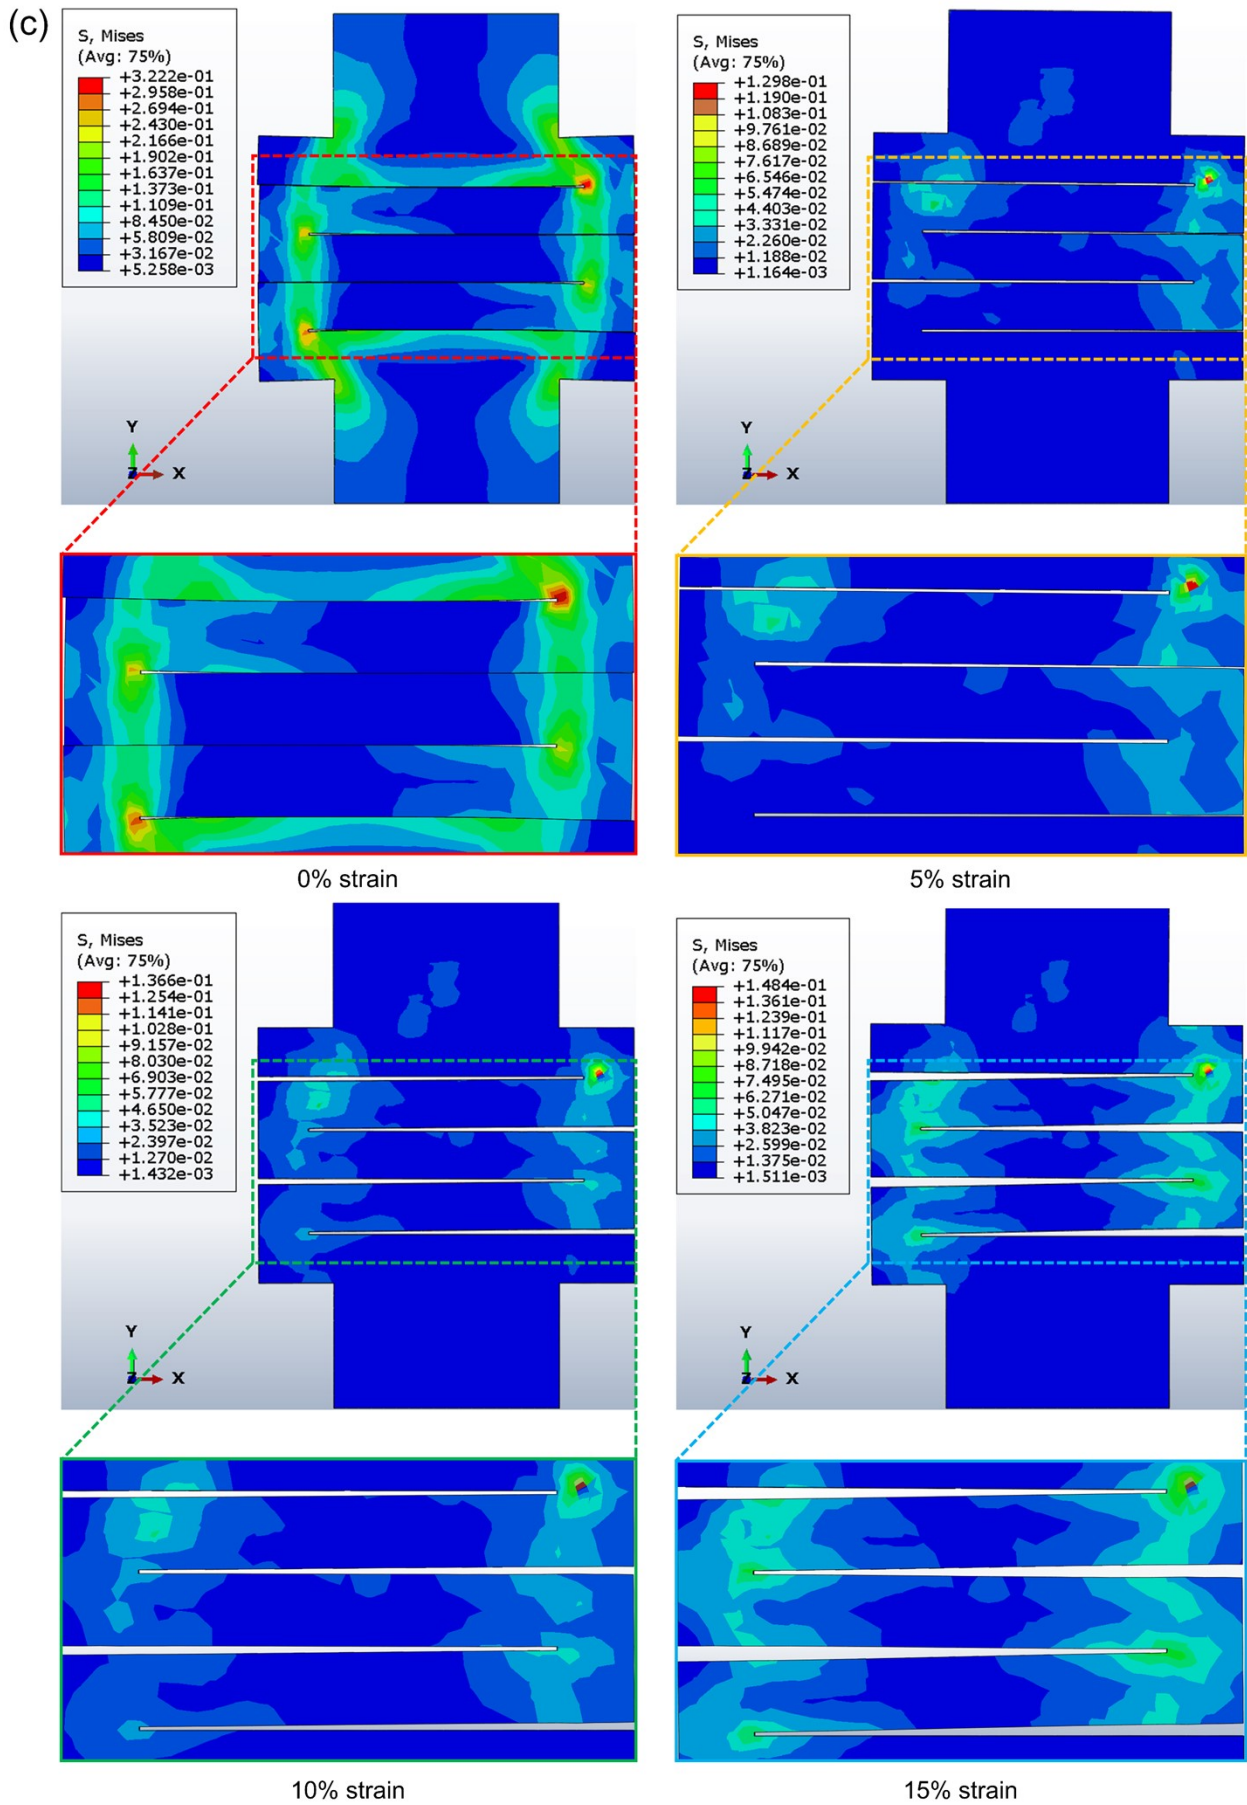

**Figure S2.** FEM analysis of strain sensors with different cutting pitch lengths between serpentine curves ( $p$ ). a) The states of the sensor with  $p = 0.5$  mm at 0% strain, 5% strain, 10% strain and 15%

strain. b) The states of the sensor with  $p = 1$  mm at 0% strain, 5% strain, 10% strain and 15% strain.  
c) The states of the sensor with  $p = 2$  mm at 0% strain, 5% strain, 10% strain and 15% strain.

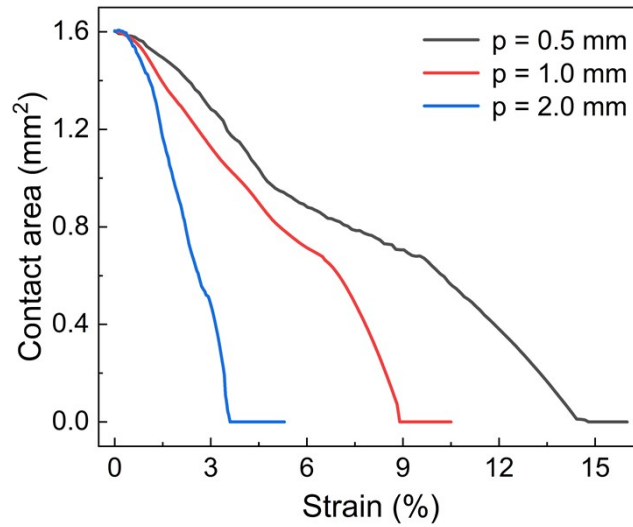

**Figure S3.** Corresponding contact area of one crack for the strain sensors with different cutting pitch lengths between serpentine curves ( $p$ ) based on Figure S2.

Table S1 Comparisons with previous works in sensing mode

| Transducing materials | Sensing modes | Gauge factor                      | Working range | Resistance relation to strain   | Off-axis mode rejection             | Temperature rejection                    | Reference |
|-----------------------|---------------|-----------------------------------|---------------|---------------------------------|-------------------------------------|------------------------------------------|-----------|
| EGaIn                 | Strain        | 4.91                              | 320%          | Non-linear                      | Not shown                           | Insensitive to temperature (20~80°C)     | [1]       |
| MWCNT                 | Strain        | 56                                | 70%           | Non-linear                      | Insensitive to pressure             | Not shown                                | [2]       |
| rGo & Nano fiber      | Strain        | 1.6(~10%)<br>;<br>7.1(~100%)<br>) | 100%          | Non-linear                      | Not shown                           | Not shown                                | [3]       |
| AgNWs                 | Strain        | 7.5(~40%)<br>;<br>12(~100%)<br>)  | 100%          | Non-linear (Two linear regions) | Not shown                           | Temperature changes by applying strain   | [4]       |
| Conductive yarns      | Strain        | 49.5                              | 100%          | Linear                          | Insensitive to pressure and bending | Insensitive to temperature (23.2~40.1°C) | [5]       |
| Nanographene          | Strain        | 325                               | 0.4%          | Linear                          | Not shown                           | Not shown                                | [6]       |
| CNT                   | Strain        | 8~207                             | 50%           | Non-                            | Not                                 | Not shown                                | [7]       |

|                                      |                             |     |      |                                                |                                                                   |                                            |              |
|--------------------------------------|-----------------------------|-----|------|------------------------------------------------|-------------------------------------------------------------------|--------------------------------------------|--------------|
|                                      |                             |     |      | linear<br>(Three<br>linear<br>regions)         | shown                                                             |                                            |              |
| Conductive<br>Composite<br>Hydrogels | Strain<br>&<br>Pressur<br>e | 3.4 | 300% | Linear                                         |                                                                   | Not shown                                  | [8]          |
| Graphene<br>composite                | Strain<br>&<br>Pressur<br>e | <15 | 100% | Non-<br>linear<br>(Three<br>linear<br>regions) |                                                                   | Not shown                                  | [9]          |
| Conductive<br>TPU                    | Strain                      | 500 | 10%  | Linear                                         | Insensitiv<br>e to<br>pressur<br>e,<br>bending<br>and<br>twisting | Insensitive to<br>temperature<br>(20~80°C) | This<br>work |

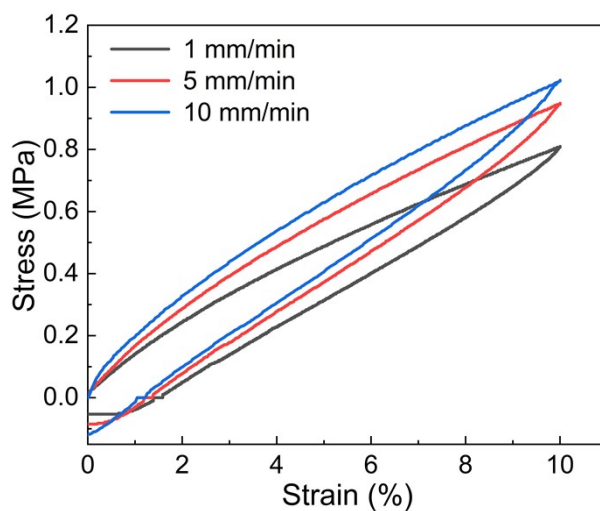

**Figure S4.** The mechanical hysteresis of the sensor under varying stretching speeds of 1 mm/min, 5 mm/min, and 10 mm/min

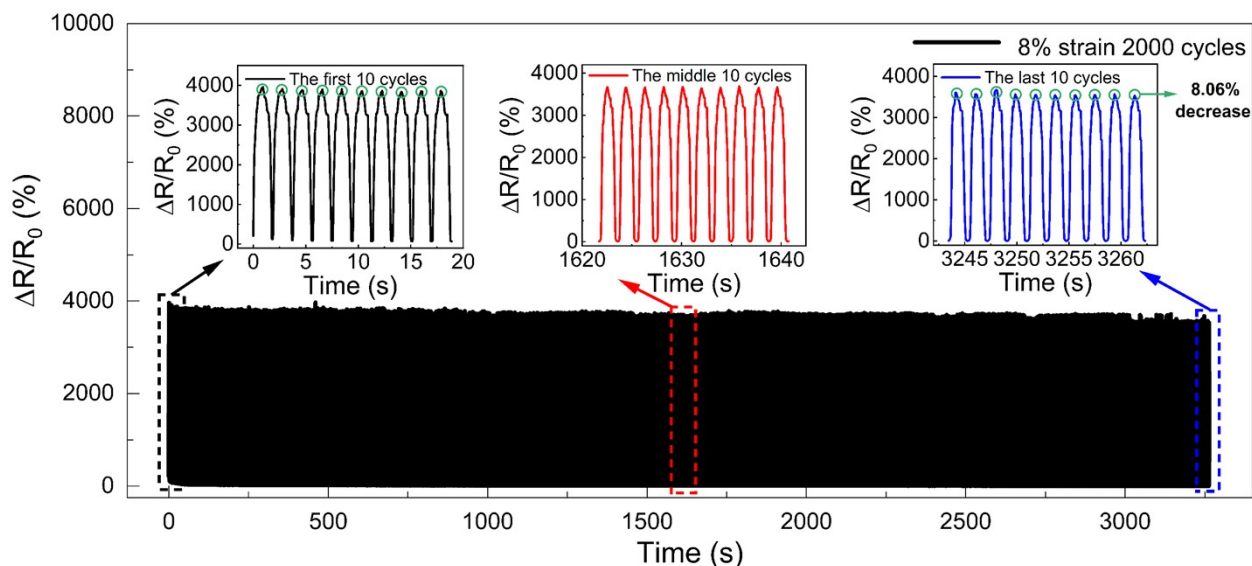

**Figure S5.** Sensor stability study over 2000 cycles at peak strain of 8%. The insets showing the first 10 cycles, middle 10 cycles, and last 10 cycles, respectively.

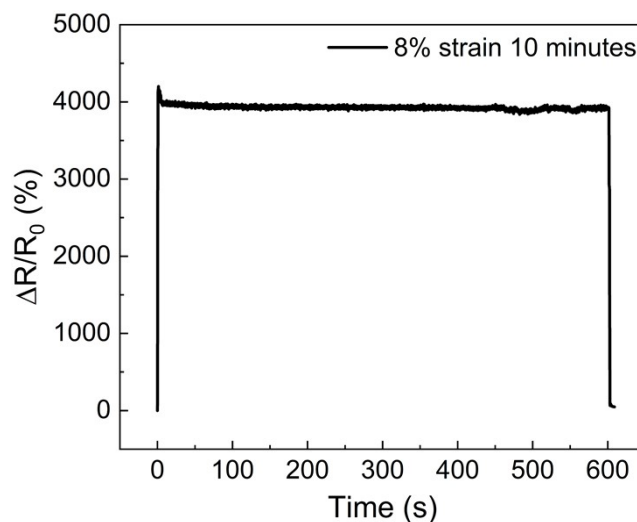

**Figure S6.** The resistance response of the sensor when subjected to a static 8% strain for more than 10 minutes.

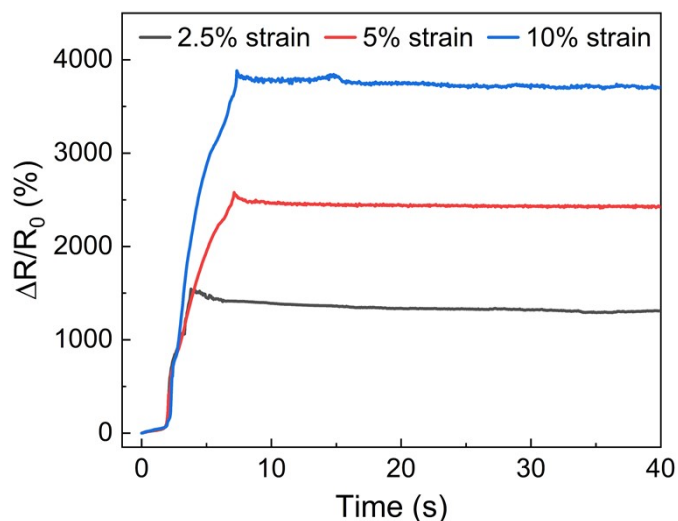

**Figure S7.** The relative resistance change of the sensor with a step strain to show low creep and hysteresis.



static stability.

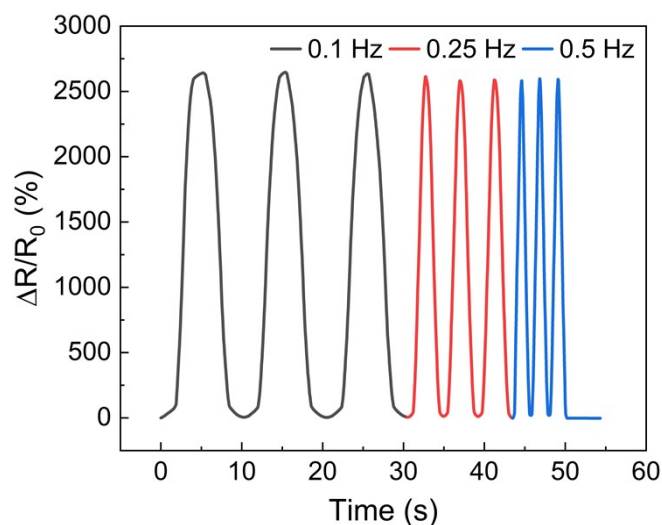

**Figure S8.** Dynamic stability of the sensor at various frequencies ranging from 0.1 to 0.5 Hz.

#### References:

- 1 J. Chen, J. Zhang, Z. Luo, J. Zhang, L. Li, Y. Su, X. Gao, Y. Li, W. Tang, C. Cao, Q. Liu, L. Wang and H. Li, *ACS Appl. Mater. Interfaces*, 2020, 12, 22200-22211.
- 2 J. Oh, J. C. Yang, J.-O. Kim, H. Park, S. Y. Kwon, S. Lee, J. Y. Sim, H. W. Oh, J. Kim and S. Park, *ACS Nano*, 2018, 12, 7546-7553.
- 3 C. Yan, J. Wang, W. Kang, M. Cui, X. Wang, C. Y. Foo, K. J. Chee and P. S. Lee, *Adv. Mater.*, 2013, 26, 2022-2027.
- 4 G. Lee, G. Y. Bae, J. H. Son, S. Lee, S. W. Kim, D. Kim, S. G. Lee and K. Cho, *Adv. Sci.*, 2020, 7, 2001184.
- 5 Z. Liu, Y. Zheng, L. Jin, K. Chen, H. Zhai, Q. Huang, Z. Chen, Y. Yi, M. Umar, L. Xu, G. Li, Q. Song, P. Yue, Y. Li and Z. Zheng, *Adv. Funct. Mater.*, 2021, 31, 2007622.
- 6 J. Zhao, C. He, R. Yang, Z. Shi, M. Cheng, W. Yang, G. Xie, D. Wang, D. Shi and G. Zhang, *Appl. Phys. Lett.*, 2012, 101, 063112.
- 7 Y. Wang, F. Wang, S. Yazigi, D. Zhang, X. Gui, Y. Qi, J. Zhong and L. Sun, *Carbon*, 2021, 173, 849-856.
- 8 H. Wei, D. Kong, T. Li, Q. Xue, S. Wang, D. Cui, Y. Huang, L. Wang, S. Hu, T. Wan and G. Yang, *ACS Sens.*, 2021, 6, 2938-2951.
- 9 J. Wang, C. Zhang, D. Chen, M. Sun, N. Liang, Q. Cheng, Y. Ji, H. Gao, Z. Guo, Y. Li, D. Sun, Q. Li and H. Liu, *ACS Appl. Mater. Interfaces*, 2020, 12, 51854-51863.
